## Clinical picture

QJM

### Knuckle–dimple sign

A 30-year-old man was noted to have short fourth and fifth metacarpals (Figure 1) on routine examination. Biochemically, he had hypocalcemia, hyperphosphatemia, high parathyroid hormone and normal renal function. He was obese [body mass index (BMI)=33]. He carried a diagnosis of

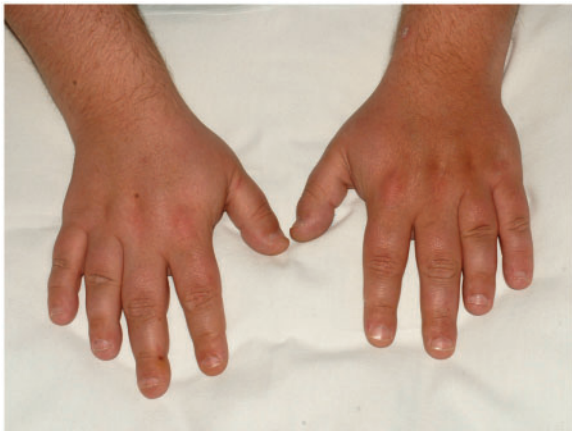

**Figure 1.** Bilaterally shortened fourth and fifth fingers seen in AHO.

pseudohypoparathyroidism. Brachydactyly is one of the commonly recognized signs of Albright's hereditary osteodystrophy (AHO),<sup>1</sup> along with short adult stature, obesity and developmental delay. Short metacarpals are not pathognomonic of AHO and can be seen in many other conditions. AHO was first described by Albright and his colleagues in 1942. AHO has been genetically linked to *GNAS1* gene.<sup>2</sup> Brachydactyly most commonly involves the fourth and fifth metacarpals, but can also be seen in other metacarpals and metatarsals.<sup>3</sup> Affected knuckles dimple when the fist is clenched causing the 'Knuckle–dimple' sign (Figures 2 and 3). Patients with AHO features can have either pseudohypoparathyroidism or pseudopseudohypoparathyroidism based on the presence of end-organ resistance to parathyroid hormone.

Photographs and text from: Drs Vijaiganesh Nagarajan and Priyanka Sharma, Department of Hospital Medicine, Cleveland Clinic, Cleveland, OH 44195, USA. email: doctorvijai@yahoo.co.uk

*Conflict of interest:* None declared.

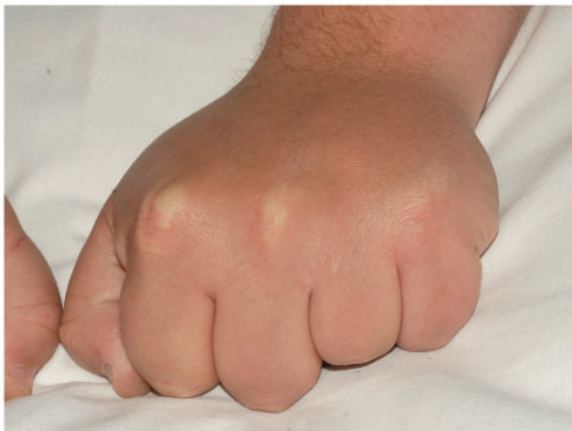

**Figure 2.** Dimple seen instead of fourth knuckle causing 'knuckle–dimple' sign.

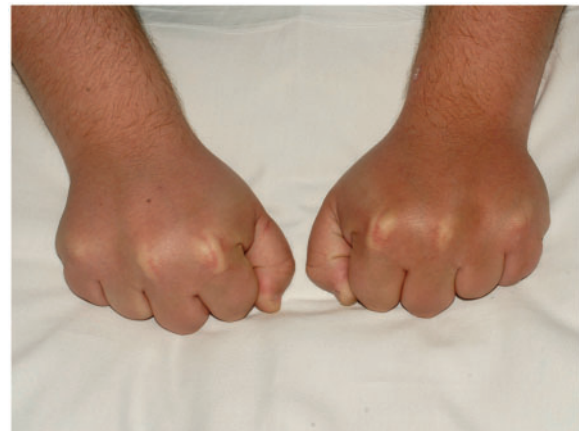

**Figure 3.** Dimple seen instead of fourth knuckle causing 'knuckle–dimple' sign.

## References

1. de Sanctis L, Vai S, Andreo MR, Romagnolo D, Silvestro L, de Sanctis C. Brachydactyly in 14 genetically characterized pseudohypoparathyroidism type 1a patients. *J Clin Endocrinol Metab* 2004; **89**:1650–5.
2. Wilson LC, Hall CM. Albright's hereditary osteodystrophy and pseudohypoparathyroidism. *Semin Musculoskelet Radiol* 2002; **6**:273–83.
3. Steinbach HL, Young DA. The roentgen appearance of pseudohypoparathyroidism (PH) and pseudo-pseudohypoparathyroidism (PPH). Differentiation from other syndromes associated with short metacarpals, metatarsals, and phalanges. *Am J Roentgenol Radium Ther Nucl Med* 1966; **97**:49–66.
